# Supplementary material for: Proteomic identification of proliferation and progression markers in human polycythemia vera stem and progenitor cells
Source: PubMed Central journal article supplement — Blood Adv. 2022 Jun 10;6(11):3480–93. doi: 10.1182/bloodadvances.2021005344 (PMC9198936; doi:10.1182/bloodadvances.2021005344), 2022-06-10
Supplement: advancesADV2021005344-suppl1.pdf [file advancesADV2021005344-suppl1.pdf]

## **Supplementary Methods**

### **Sample preparation for proteomics measurements:**

For mass spectrometry (MS) analysis, 25,000 cells per sample were sorted into protein low-binding micro-centrifuge tubes (Eppendorf) containing 300  $\mu$ l PBS buffer. The remaining material was sorted into separate micro-centrifuge tubes for spectral library generation. Depending on patient sample and cell type, this resulted in 19 additional samples (9x HSC/MPP, 6x GMP, 3x CMP, 1x MEP) with 47,860 to 91,749 cells (see supplementary table S3). Sorted cells were pelleted by centrifugation at 400 g for 12 min at 4°C. The supernatant was carefully removed, leaving ~30  $\mu$ l on top of the pellet to avoid losing the non-adherent cell pellet. The pelleted cells were then snap frozen in liquid nitrogen. The remaining FACS buffer was lyophilized.

The lyophilized cell pellets were resuspended in 10  $\mu$ l of 8 M urea in 100 mM ammonium hydrogen carbonate. Cells were lysed by sonication with a VialTweeter (Hielscher) at an amplitude of 60%, a cycle of 60% and a duration of 20 s for 3 times with intermediate cooling on ice. Protein content and amount of protease to be added was determined by submitting 100,000 CD34+ hematopoietic stem/progenitor cells to a BCA protein assay following the manufacturer's instructions (Pierce/ThermoFisher). Samples were diluted to 4 M urea with 100 mM ammonium hydrogen carbonate. They were treated with 1.25 U Benzonase Nuclease (Sigma-Aldrich) per 25,000 cells for 30 min at 37 °C. Reduction of disulfide bonds was performed by adding tris-(2-carboxyethyl)-phosphine (Sigma-Aldrich) to 5 mM and incubating at 37 °C for 30 min with shaking in a Thermomixer (Eppendorf). Alkylation of free thiol groups was performed by adding iodoacetamide (Sigma-Aldrich) to 10 mM in the dark for 30 min at room temperature. Samples were then diluted to 1 M urea and digested. Sequencing grade trypsin (Promega) was added at an enzyme-to-substrate ratio of 1:50 (extrapolated from the BCA assay results) for an overnight digestion at 37 °C. We adjusted samples to 2 % formic acid and desalted them with Empore Disks C18 (3M) self-packed into StageTips format.<sup>1</sup> After drying in a vacuum centrifuge, samples were resuspended in 11  $\mu$ l of 2 % acetonitrile and 0.1% formic acid with the addition of iRT peptides (Biognosys) for the following MS analysis.<sup>2</sup> Peptide concentrations were determined using the quantitative fluorimetric peptide assay (Pierce/Thermo Scientific) following the manufacturer's guidelines.

### **Mass spectrometry analysis:**

Nanoflow LC-MS/MS measurements were carried out on an EASY-nLC 1200 system (Thermo Scientific) connected to an Orbitrap Fusion Lumos Tribrid mass spectrometer (Thermo Scientific) with a Nanospray Flex ion source.

### **Individual patient/control sample separation:**

Peptide separation was performed on an Acclaim PepMap 100 C18 column (Thermo Scientific) with an inner diameter of 75  $\mu$ m, a length of 25 cm, and a particle size of 2  $\mu$ m. We operated the column at room temperature and at a flow rate of 300 nl/min. LC solvent A was composed of 98 % water, 2 % acetonitrile and 0.1 % formic acid. LC solvent B consisted of 80 % acetonitrile, 20 % water and 0.1 % formic acid. Peptides for individual measurements of patient/control samples were separated by a linear gradient from 5 to 37 % B over 120 min.

### **Library sample separation:**

Peptides from patients/controls for spectral library generation were separated by a linear gradient from 5 to 37 % B over 240 min. In addition to the patient/control sample library, a HEK293 spectral library was generated. 80  $\mu$ g peptides from HEK293 cells were treated by high pH reversed-phase peptide fractionation using a dedicated spin column kit (Pierce/Thermo Scientific) and following manufacturer's guidelines. Briefly, we collected 8 fractions, eluting with 300  $\mu$ l with increasing acetonitrile content from 5 % to 50 % in 0.1 % trimethylamine. The fractions were dried in a vacuum centrifugation and redissolved in 25  $\mu$ l of 2 % acetonitrile, 0.1 % formic acid with iRT peptides. 2  $\mu$ l were injected per measurement. In addition, unfractionated whole lysates of HEK293 were measured by LC-MS (see supplementary table S3). Peptides from HEK293 cells for library generation were separated over 240 min for unfractionated samples and 180 min for high pH reversed phase fractions, respectively.

### **MS instrument settings:**

The MS instrument was operated either in the DDA (library) or DIA (individual patient/control sample measurements) mode. In both cases, fragmentation was achieved by higher energy collision dissociation

(HCD) at a normalized collision energy setting of 27 %. The Orbitrap analyzer was set at a resolution of 120,000 and 30,000 for MS1 and MS2, with maximum injection times of 100 ms and 50 ms, respectively. For DIA, the mass range monitored in MS1 was 350-1500 m/z and 200-1800 m/z in MS2. For DDA, the auto m/z normal scan range mode was used. In MS1, we set the AGC target to 2e5. In MS2, we set the AGC target to 5e5 for DIA and 8e4 for DDA.

We used the top speed setting for DDA measurements and library generation: one MS1 survey scan was followed by the acquisition of MS/MS spectra for a cycle time of up to a maximum of 3 s. In DIA mode (individual patient/control sample measurements), one MS1 scan was followed by 40 MS2 windows of equal width (15 m/z) with an overlap of 1 m/z, covering precursors in the range of 399.5-1000.5 m/z. This led to a cycle time of 3.4 s. We acquired data with Xcalibur 4.0.27.10 and Tune Plus version 2.1.

### **Data analysis:**

#### **Library:**

DDA data were searched by Mascot<sup>3</sup> (Matrix Science, version 2.5.1) and Comet<sup>4</sup> version 2016.01 rev. 2 against the Swissprot reviewed subset of the human UniProt database. The latter contained 20,199 protein entries and one additional protein entry for the concatenated iRT peptide sequences, as well as appended decoy sequences generated by sequence reversal (keeping C-terminal K and R residues). The following settings were applied: enzyme = trypsin, missed cleavages =  $\leq 2$ , peptide tolerance =  $\pm 10$  ppm, MS/MS tolerance = 0.02 Da, fixed modification = carbamidomethylation on cysteine, variable modification = oxidation on methionine.

Spectral libraries from DDA runs were generated as previously delineated.<sup>5</sup> Briefly, we independently adjusted the peptide-level false discovery rates (FDR) for the search outcomes to 1% for Mascot and Comet results using PeptideProphet (TPP v4.7 rev 0).<sup>6,7</sup> Mascot and Comet results were merged by iProphet<sup>8</sup> and filtered to 1% protein FDR by Mayu<sup>9</sup> (v 1.08). We used SpectraST<sup>10,11</sup> (v 5.0) to compile a consensus library for the query of the DIA measurements with the following filter criteria: include peptides at 1% peptide FDR for proteins at 1% protein FDR, 6 fragments per peptide, and fragment m/z range of 350 - 1800 m/z. The HEK293 library comprised 112,227 peptide precursor entries from 9,127 protein groups. The combined library for HEK293 and hematopoietic stem and progenitor cells included 146,610 peptide precursors from 10,057 protein groups.

#### **Individual patient/control sample measurements:**

DIA data were assessed by Spectronaut 11<sup>12</sup> (Biognosys) querying the library mentioned above with the following settings: data extraction with a tolerance of 10 ppm and 25 ppm for MS1 and MS2 level, with a dynamic retention time extraction window and automatic non-linear iRT retention time calibration, identification at a precursor Q-value cutoff of 0.01 and protein Q-value of 0.01, quantification based on MS2 level area, without cross-run normalization. We counted protein groups as defined by Spectronaut and exported the Spectronaut report (information on precursor, not fragment level) for further processing in R. All R scripts are deposited on github and can be accessed under <https://github.com/ge11232002/p2378>.

| <b>PROTEOMIC/TRANSCRIPTOMIC ANALYSES</b> |                 |                   |            |            |                          |                                |                              |
|------------------------------------------|-----------------|-------------------|------------|------------|--------------------------|--------------------------------|------------------------------|
| <b>Group</b>                             | <b>Subgroup</b> | <b>Patient ID</b> | <b>Age</b> | <b>Sex</b> | <b>Diagnosis</b>         | <b>JAK2-V617 allele burden</b> | <b>Therapy</b>               |
| PV                                       | PVchron.UT      | PV1               | 57         | m          | PV                       |                                | ASA, BP                      |
| PV                                       | PVchron.UT      | PV5               | 59         | m          | PV                       | 43%                            | ASA                          |
| PV                                       | PVchron.UT      | PV6               | 53         | m          | PV                       | 93%                            | ASA                          |
| PV                                       | PVchron.UT      | PV8               | 68         | f          | PV                       |                                | ASA, BP, statin              |
| PV                                       | PVchron.UT      | PV9               | 55         | m          | PV                       | 92%                            | ASA, BP                      |
| PV                                       | PVchron.UT      | PV12              | 44         | m          | PV                       |                                | ASA, BP                      |
| PV                                       | PVchron.UT      | PV13              | 55         | m          | PV                       | 78%                            | ASA, BP                      |
| PV                                       | PVchron.UT      | PV14              | 44         | f          | PV                       | 97%                            | ASA, anti-dep                |
| PV                                       | PVchron.UT      | PV16              | 50         | m          | PV                       | 43%                            | ASA                          |
| PV                                       | PVchron.HU      | PV2               | 65         | m          | PV                       |                                | HU, ASA, BP, statin          |
| PV                                       | PVchron.HU      | PV3               | 77         | m          | PV                       | 95%                            | HU, ASA, BP                  |
| PV                                       | PVchron.HU      | PV4               | 57         | m          | PV                       | 4%                             | HU, ASA, BP                  |
| PV                                       | PVchron.HU      | PV5               | 60         | m          | PV                       | 43%                            | HU, ASA                      |
| PV                                       | PVchron.HU      | PV7               | 79         | m          | PV                       |                                | HU, ASA, BP, anti-epi        |
| PV                                       | PVprog.HU       | PV10              | 65         | m          | PV transforming into AML |                                | HU, ASA                      |
| PV                                       | PVprog.HU       | PV11              | 61         | m          | Post-PV MF               | 99%                            | HU, ASA                      |
| PV                                       | PVprog.HU       | PV15              | 82         | m          | Post-PV MF               |                                | HU, phenprocoumon, anti-uric |
| PV                                       | PVprog.UT       | PV17              | 64         | m          | Post-PV MF               |                                | BP, anti-uric, pred          |
| PV                                       | PVprog.UT       | PV18              | 72         | f          | PV transforming into MF  | 98%                            | ASA, BP, anti-uric           |
| Control                                  | Control         | CON1              | 45-74      | m,f        | 4 Healthy Donors         |                                | n.a.                         |
| Control                                  | Control         | CON2              | 45-74      | m,f        | 4 Healthy Donors         |                                | n.a.                         |
| Control                                  | Control         | CON3              | 45-74      | m,f        | 4 Healthy Donors         |                                | n.a.                         |
| Control                                  | Control         | CON4              | 71         | m          | Hemochromatosis          |                                | BP                           |
| Control                                  | Control         | CON5              | 42         | m          | Hemochromatosis          |                                | none                         |
| Control                                  | Control         | CON5              | 66         | m          | Hemochromatosis          |                                | ASA, BP, anti-dep            |
| Control                                  | Control         | CON5              | 61         | f          | Hemochromatosis          |                                | inhal                        |
| Control                                  | Control         | CON5              | 40         | m          | Hemochromatosis          |                                | none                         |
| Control                                  | Control         | CON6              | 54         | m          | Hemochromatosis          |                                | ASA, anti-diab               |
| Control                                  | Control         | CON7              | 45         | m          | Hemochromatosis          |                                | thyrox                       |
| Control                                  | Control         | CON7              | 60         | f          | Hemochromatosis          |                                | BP, HRT                      |
| Control                                  | Control         | CON8              | 63         | m          | Hemochromatosis          |                                | statin                       |
| <b>VALIDATION EXPERIMENTS</b>            |                 |                   |            |            |                          |                                |                              |
| <b>Group</b>                             | <b>Subgroup</b> | <b>Patient ID</b> | <b>Age</b> | <b>Sex</b> | <b>Diagnosis</b>         | <b>JAK2-V617 allele burden</b> | <b>Therapy</b>               |
| PV                                       | PVchron.UT      | PV6               | 47         | m          | PV                       | 93%                            | ASA                          |
| PV                                       | PVchron.UT      | PV9               | 53         | m          | PV                       | 92%                            | ASA, BP                      |
| PV                                       | PVchron.UT      | PV13              | 55         | m          | PV                       | 78%                            | ASA                          |
| PV                                       | PVchron.UT      | PV14              | 43         | f          | PV                       | 97%                            | ASA, Infliximab              |

*Proteome of polycythemia vera stem cells*

|         |            |       |    |   |                         |     |                    |
|---------|------------|-------|----|---|-------------------------|-----|--------------------|
| PV      | PVchron.UT | PV19  | 49 | f | PV                      |     | Clopidogrel        |
| PV      | PVchron.UT | PV22  | 44 | m | PV                      |     | ASA, BP            |
| PV      | PVchron.UT | PV23  | 55 | m | PV                      |     | ASA                |
| PV      | PVprog.RU  | PV11  | 62 | m | Post-PV MF              | 99% | Ruxolitinib, ASA   |
| PV      | PVprog.UT  | PV18  | 71 | f | PV transforming into MF |     | ASA, BP            |
| PV      | PVprog.UT  | PV20  | 77 | m | Post-PV AML             |     | ASA, BP, anti-uric |
| Control | Control    | CON9  | 54 | m | Healthy Donor           |     | n.a.               |
| Control | Control    | CON10 | 55 | m | Healthy Donor           |     | n.a.               |
| Control | Control    | CON11 | 56 | m | Healthy Donor           |     | n.a.               |
| Control | Control    | CON12 | 74 | m | Healthy Donor           |     | n.a.               |
| Control | Control    | CON13 | 45 | f | Healthy Donor           |     | n.a.               |
| Control | Control    | CON14 | 53 | f | Healthy Donor           |     | n.a.               |
| Control | Control    | CON15 | 59 | m | Healthy Donor           |     | n.a.               |
| Control | Control    | CON16 | 46 | f | Healthy Donor           |     | n.a.               |
| Control | Control    | CON17 | 57 | m | Healthy Donor           |     | n.a.               |
| Control | Control    | CON18 | 53 | m | Healthy Donor           |     | n.a.               |
| Control | Control    | CON19 | 62 | m | Healthy Donor           |     | n.a.               |
| Control | Control    | CON20 | 65 | f | Healthy Donor           |     | n.a.               |

**Table S1. Characteristics of the PV patients and controls studied.**

For PV1/8/12, CON1, CON2 and CON3, samples from different individuals had to be pooled to guarantee adequate HSC/MPP numbers for downstream MS and RNA-seq measurements. Abbreviations: PV – polycythemia vera; MF – myelofibrosis; AML – acute myeloid leukemia; chron – chronic; prog – progressed; UT – untreated; HU – under treatment with hydroxyurea; RU – under treatment with ruxolitinib; ASA – acetylsalicylic acid; HU – hydroxyurea; BP – blood pressure medication; anti-dep – anti-depressive medication; anti-epi – anti-epileptic medication; anti-uric – uric acid lowering medication; pred – prednisone; inhal – inhalative medication; anti-diab – anti-diabetic medication; thyrox – thyroxine medication; HRT – hormone replacement therapy; m – male; f – female.

| <b>Antibody</b>                                       | <b>Clone</b> | <b>Provider</b>                   | <b>Order number</b> |
|-------------------------------------------------------|--------------|-----------------------------------|---------------------|
| Tricolor/phycoerythrin (PE)-Cy5-conjugated anti-hCD2  | S5.5         | ThermoFisherScientific-Invitrogen | CD0206              |
| Tricolor/phycoerythrin (PE)-Cy5-conjugated anti-hCD3  | 7D6          | ThermoFisherScientific-Invitrogen | MHCD03065           |
| Tricolor/phycoerythrin (PE)-Cy5-conjugated anti-hCD4  | S3.5         | ThermoFisherScientific-Invitrogen | MHCD0406            |
| Tricolor/phycoerythrin (PE)-Cy5-conjugated anti-hCD7  | CD7-6B7      | ThermoFisherScientific-Invitrogen | MHCD0706            |
| Tricolor/phycoerythrin (PE)-Cy5-conjugated anti-hCD8  | 3B5          | ThermoFisherScientific-Invitrogen | MHCD0806            |
| Tricolor/phycoerythrin (PE)-Cy5-conjugated anti-hCD14 | TuK4         | ThermoFisherScientific-Invitrogen | MHCD1406            |
| Tricolor/phycoerythrin (PE)-Cy5-conjugated anti-hCD19 | SJ25-C1      | ThermoFisherScientific-Invitrogen | MHCD1906            |
| Tricolor/phycoerythrin (PE)-Cy5-conjugated anti-hCD56 | MEM-188      | ThermoFisherScientific-Invitrogen | MHCD5606            |
| Phycoerythrin (PE)-Cy5 anti-hCD10                     | HI10a        | BioLegend                         | 312206              |
| Phycoerythrin (PE)-Cy5 anti-hCD11b                    | ICRF44       | BioLegend                         | 301308              |
| Phycoerythrin (PE)-Cy5 anti-hCD20                     | 2H7          | BioLegend                         | 302308              |
| Phycoerythrin (PE)-Cy5 anti-hCD235a                   | GA-R2        | BD Biosciences                    | 559944              |
| PE-Cy7-conjugated anti-hCD34                          | 8G12         | BD Biosciences                    | 348811              |
| FITC-conjugated anti-hCD38                            | HIT2         | BD Biosciences                    | 555459              |
| APC-conjugated anti-hCD123                            | 6H6          | ThermoFisherScientific-Invitrogen | 17-1239-42          |
| APC780-conjugated anti-hCD45RA                        | HI100        | ThermoFisherScientific-Invitrogen | 47-0458-41          |
| BV711-conjugated anti-hCD45RA                         | HI100        | Biolegend                         | 304138              |
| PE-conjugated anti-hCLU                               | 01           | Sinobiological                    | 11297-MM01_P        |
| PE-conjugated anti-hLGALS9                            | 9M1-3        | BioLegend                         | 348906              |
| PE-conjugated monoclonal mouse IgG1 kappa             | P3.6.2.8.1   | ThermoFisherScientific-Invitrogen | 12-4714-41          |
| PE-conjugated monoclonal mouse IgG1 kappa             | MOPC-21      | BioLegend                         | 400112              |

**Table S2. Antibodies used in the study.**

*Proteome of polycythemia vera stem cells*

|                                | <b>Sample name</b> | <b>Cell subpopulation</b> | <b>Cell number</b> |
|--------------------------------|--------------------|---------------------------|--------------------|
| <b>Patient samples</b>         |                    |                           |                    |
| samon_D1807_216                | FMA 43             | MEP                       | 82728              |
| samon_D1807_218                | FMA 42             | CMP                       | 85686              |
| samon_D1807_219                | FMA 42             | CMP                       | 85686              |
| samon_D1807_220                | FMA 33             | CMP                       | 47860              |
| samon_D1807_222                | FMA 34             | HSC/MPP                   | 49395              |
| samon_D1807_223                | FMA 28             | HSC/MPP                   | 75711              |
| samon_D1807_225                | FMA 41             | GMP                       | 91749              |
| samon_D1807_226                | FMA 50             | GMP                       | 67210              |
| samon_D1807_227                | FMA 50             | GMP                       | 67210              |
| samon_D1807_228                | FMA 50             | GMP                       | 67210              |
| samon_D1807_230                | FMA 60             | GMP                       | 56250              |
| samon_D1807_232                | FMA 60             | GMP                       | 56250              |
| samon_D1807_234                | FMA 59             | HSC/MPP                   | 69767              |
| samon_D1807_235                | FMA 59             | HSC/MPP                   | 69767              |
| samon_D1807_236                | FMA 59             | HSC/MPP                   | 69767              |
| samon_D1807_238                | FMA 44             | HSC/MPP                   | 88297              |
| samon_D1807_239                | FMA 44             | HSC/MPP                   | 88297              |
| samon_D1807_240                | FMA 44             | HSC/MPP                   | 88297              |
| samon_D1807_241                | FMA 44             | HSC/MPP                   | 88297              |
| <b>Healthy control samples</b> |                    |                           |                    |
| samon_D1704_035                | 236_CMP            | CMP                       | 45420              |
| samon_D1704_036                | 234_CMP            | CMP                       | 52361              |
| samon_D1704_038                | 236_MEP            | MEP                       | 43398              |
| samon_D1704_039                | 235_MEP            | MEP                       | 57978              |
| samon_D1704_041                | 236_HSC            | HSC/MPP                   | 64328              |
| samon_D1704_042                | 236_HSC            | HSC/MPP                   | 64328              |
| samon_D1704_044                | 235_GMP            | GMP                       | 48182              |
| samon_D1704_045                | 235_GMP            | GMP                       | 48182              |
| samon_D1704_047                | 185_MEP            | MEP                       | 71370              |
| samon_D1704_048                | 185_MEP            | MEP                       | 71370              |
| samon_D1704_050                | 234_HSC            | HSC/MPP                   | 71141              |
| samon_D1704_051                | 234_HSC            | HSC/MPP                   | 71141              |
| samon_D1704_053                | 185_GMP            | GMP                       | 70658              |
| samon_D1704_054                | 185_GMP            | GMP                       | 70658              |
| samon_D1704_056                | 185_HSC            | HSC/MPP                   | 89140              |
| samon_D1704_057                | 185_HSC            | HSC/MPP                   | 89140              |
| samon_D1704_059                | 235_CMP            | CMP                       | 91457              |
| samon_D1704_060                | 235_CMP            | CMP                       | 91457              |
| samon_D1704_062                | 185_CMP            | CMP                       | 60015              |
| samon_D1704_063                | 185_CMP            | CMP                       | 60015              |
| samon_D1704_064                | 185_CMP            | CMP                       | 60015              |
| samon_D1704_065                | 185_CMP            | CMP                       | 60015              |
| samon_D1704_067                | 235_HSC            | HSC/MPP                   | 67103              |
| samon_D1704_068                | 235_HSC            | HSC/MPP                   | 67103              |

*Proteome of polycythemia vera stem cells*

|                         |                        |         |       |
|-------------------------|------------------------|---------|-------|
| samon_D1704_069         | 235_HSC                | HSC/MPP | 67103 |
| samon_D1704_070         | 235_HSC                | HSC/MPP | 67103 |
| <b>HEK cell samples</b> |                        |         |       |
| samon_D1705_122         | HEK highpH fr1         |         |       |
| samon_D1705_123         | HEK highpH fr1         |         |       |
| samon_D1705_124         | HEK highpH fr2         |         |       |
| samon_D1705_125         | HEK highpH fr2         |         |       |
| samon_D1705_127         | HEK highpH fr3         |         |       |
| samon_D1705_128         | HEK highpH fr3         |         |       |
| samon_D1705_129         | HEK highpH fr4         |         |       |
| samon_D1705_130         | HEK highpH fr4         |         |       |
| samon_D1705_132         | HEK highpH fr5         |         |       |
| samon_D1705_133         | HEK highpH fr5         |         |       |
| samon_D1705_134         | HEK highpH fr6         |         |       |
| samon_D1705_135         | HEK highpH fr6         |         |       |
| samon_D1705_137         | HEK highpH fr7         |         |       |
| samon_D1705_138         | HEK highpH fr7         |         |       |
| samon_D1705_139         | HEK highpH fr8         |         |       |
| samon_D1705_140         | HEK highpH fr8         |         |       |
| samon_D1705_143         | HEK unfr corr128kcells |         |       |
| samon_D1705_144         | HEK unfr corr128kcells |         |       |
| samon_D1705_146         | HEK unfr corr128kcells |         |       |
| samon_D1705_147         | HEK unfr corr128kcells |         |       |

**Table S3. Samples for library generation.**

Abbreviations: HSC/MPP – hematopoietic stem cell/multipotent progenitor; CMP – common myeloid progenitor; MEP – megakaryocyte-erythrocyte progenitor; GMP – granulocyte-macrophage progenitor.

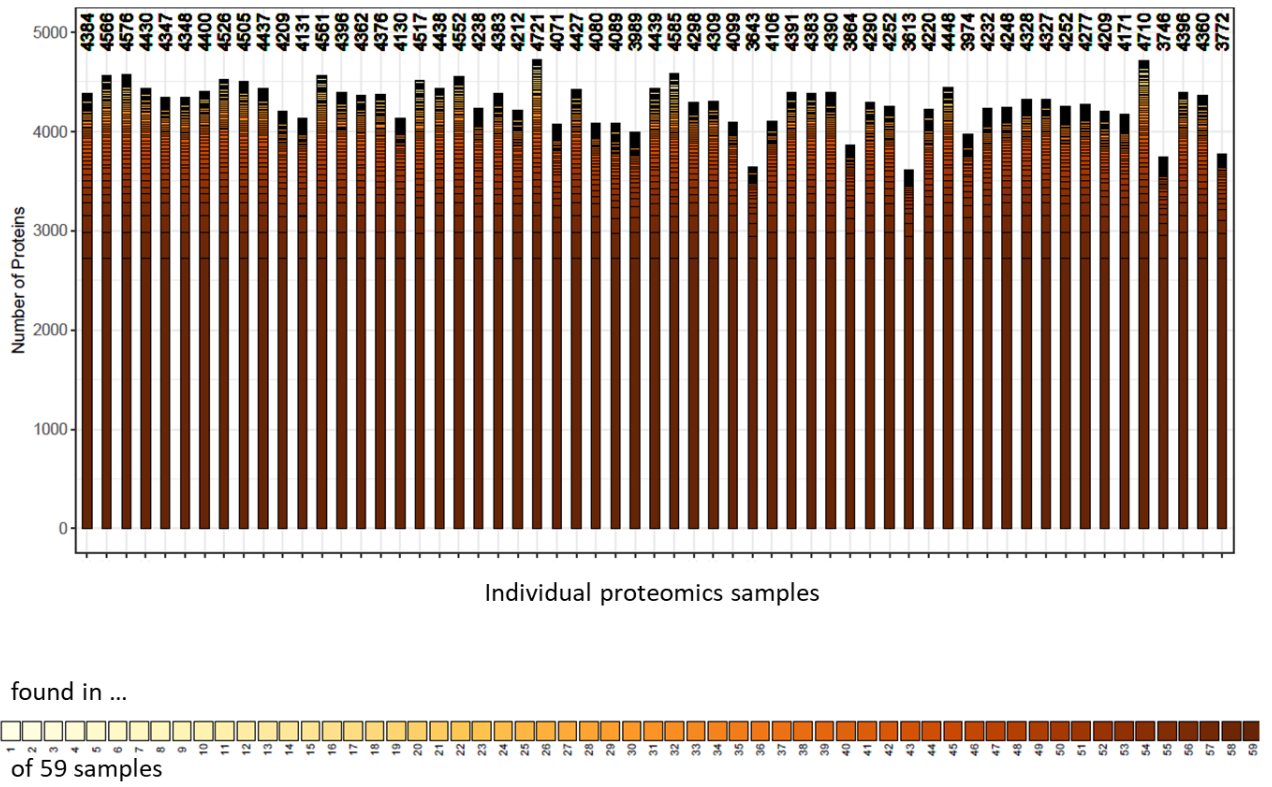

Figure S1: Number of identified proteins in individual proteomics samples.



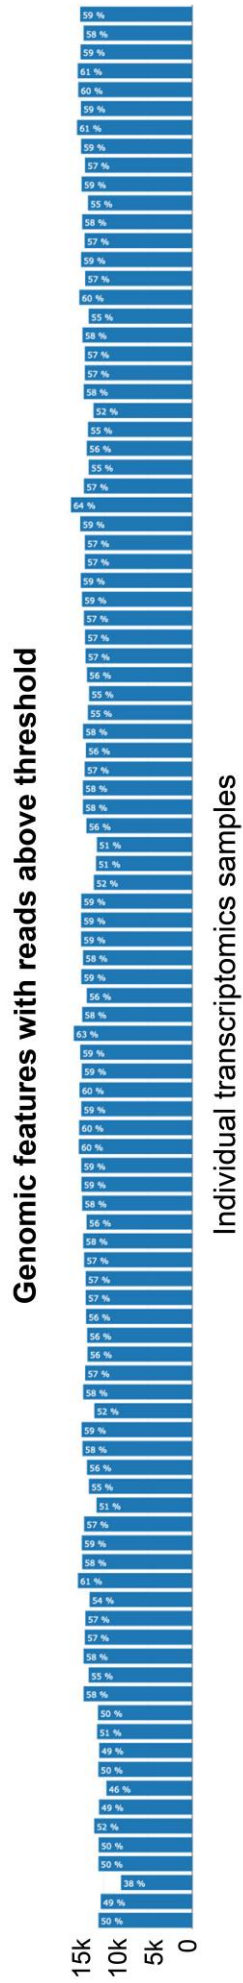

Figure S2. Number of expressed genes in individual transcriptomics samples with percentage of expressed genes over all coding genes.

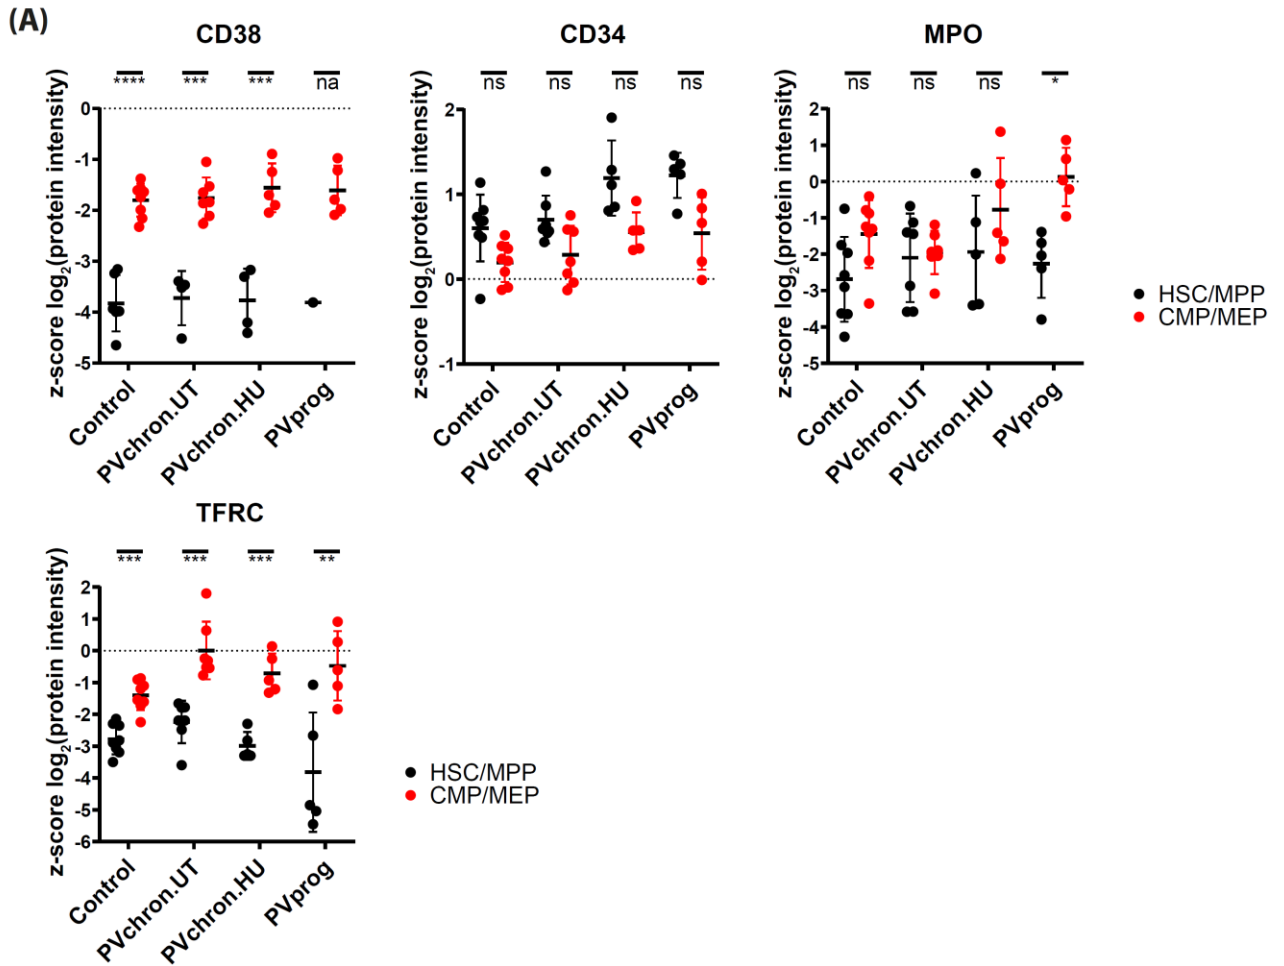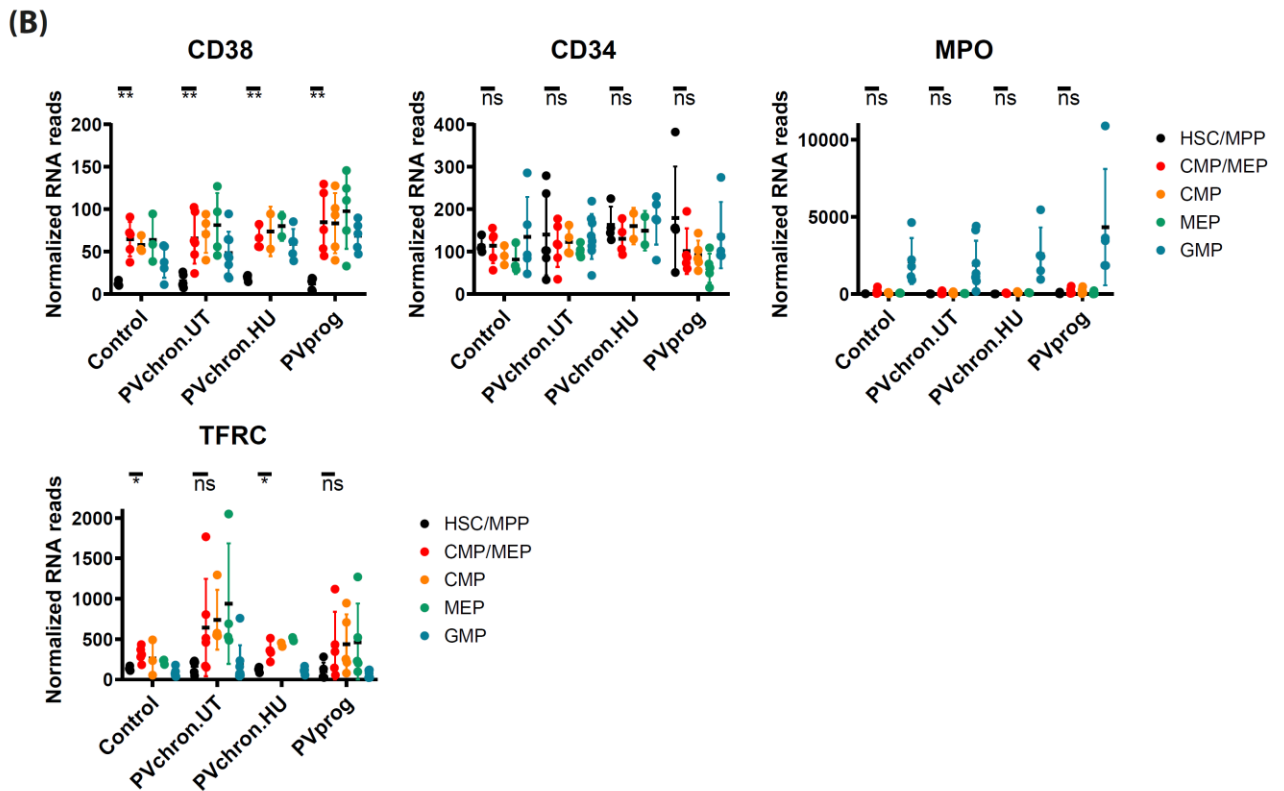

**Figure S3: Expression of known protein (A) and RNA (B) markers.** Surface protein and lineage markers were expressed as expected and previously reported. CD38 is a surface protein marker used in the FACS-isolation of CMP/MEPs, CMPs, MEPs, GMPs (CD38<sup>high</sup>) and HSC/MPPs (CD38<sup>low</sup>). CD34 is the surface protein marker used for MACS-isolation and expressed in all HSPCs. MPO is a lineage marker for differentiated granulocytes and thus expected to be higher in more differentiated myeloid progenitor cells such as CMP/MEPs and especially GMPs compared to HSC/MPPs.<sup>13</sup> TFRC or CD71 is a lineage marker for erythroid precursors and thus expected to be higher in CMP/MEPs, CMPs and MEPs compared to HSC/MPPs.<sup>14</sup> NA's were not imputed. Error bars represent standard deviations. \* adj. p < 0.05; \*\* adj. p < 0.01; \*\*\* adj. p < 0.001; \*\*\*\* adj. p < 0.0001 (see methods section for statistical information).

**z-score log<sub>2</sub>(protein intensity)** is defined as  $(\log_2(\text{protein intensity}) - \text{mean}(\log_2(\text{protein intensity}))) / \text{sd}(\log_2(\text{protein intensity}))$ .

**Normalized RNA reads** are defined as fragments per kilobase per million (FPKM), i.e.  $(\text{number of fragments mapped to a gene} \times 10^3 \times 10^6) / (\text{total number of mapped fragments from a given library} \times \text{gene length in base pairs})$ .

Abbreviations: UT – untreated; HU – under treatment with hydroxyurea; chron – chronic; prog – progressed.

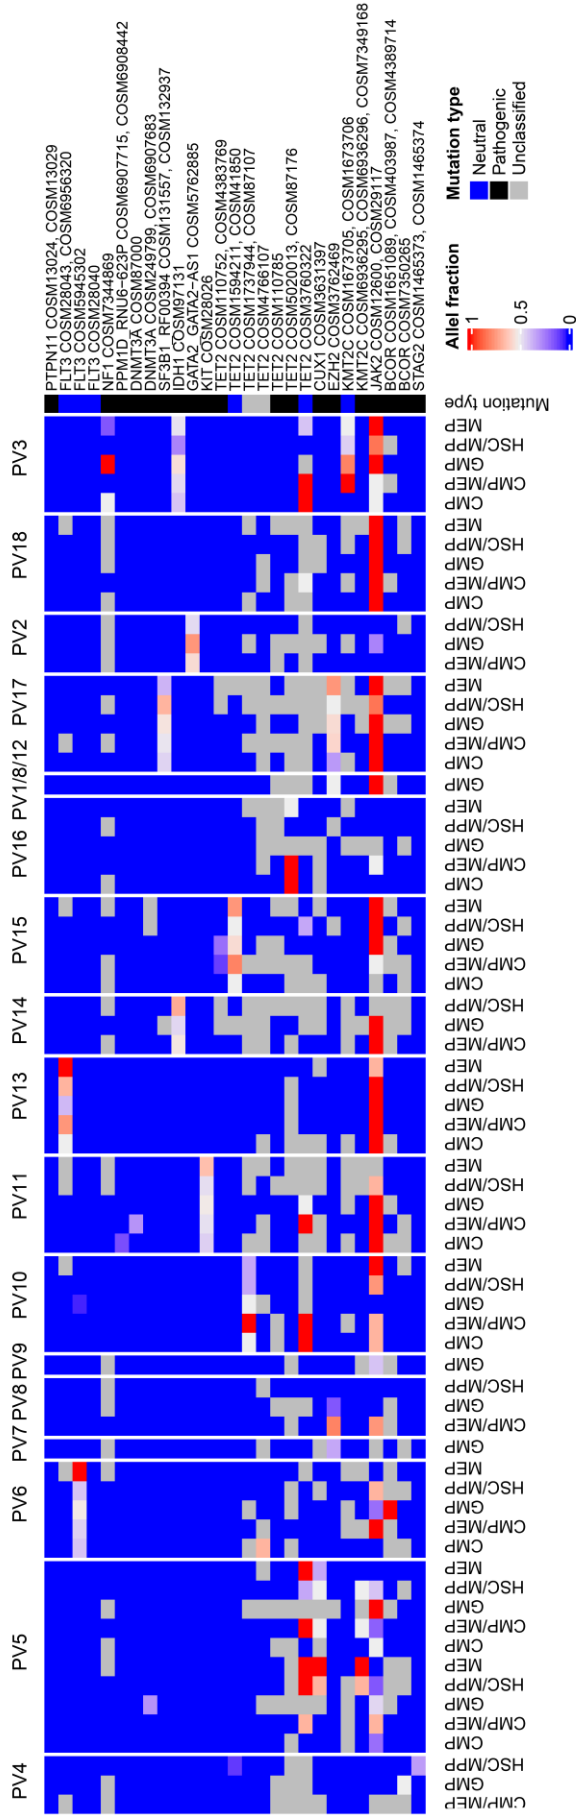

**Figure S4. Mutational analysis based on RNA-seq data in patients with PV.** Shown are the allele burdens of the identified mutations measured. Point mutations predicted by FATHMM as pathogenic are labelled in black, mutations classified as neutral are labelled in blue, unclassified mutations are labelled in grey.<sup>15</sup> See also Figure 1B and Table 1. For PV1/8/12, samples from different individuals had to be pooled to guarantee adequate HSC/MPP numbers for downstream MS and RNA-seq measurements.

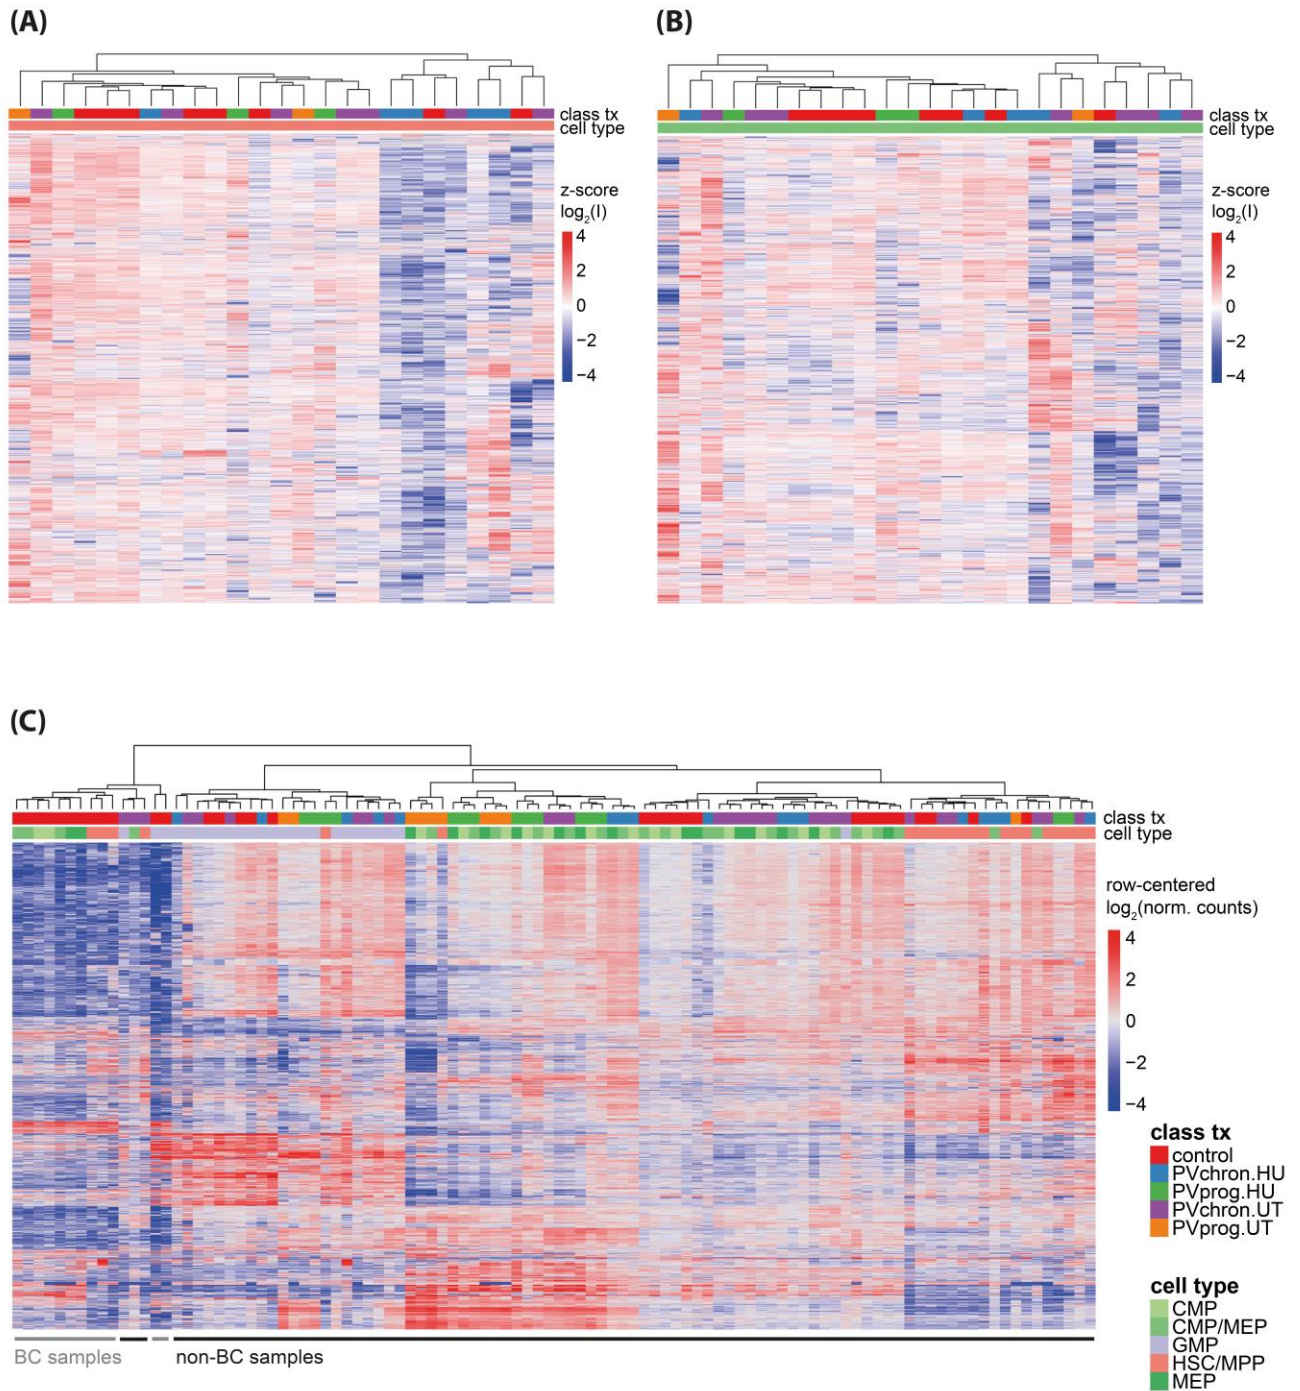

**Figure S5: Heatmaps** (non-supervised hierarchical complete clustering of Euclidean distances) of intensities for the 3769 proteins uniquely identified across **(A)** HSC/MPPs, **(B)** CMP/MEPs and of the **(C)** 2000 most variant mRNAs identified in HSC/MPPs, CMP/MEPs, CMPs, MEPs, and GMPs isolated from 18 PV patients and 21 controls. Z-score log<sub>2</sub>(I) refers to the z-score of log<sub>2</sub> transformed protein intensities. Class (PV patient or control), therapy (treatment (tx) with hydroxyurea (HU) or untreated (UT)) and progression status (chronic (chron) or progressed (prog)) is marked in red, blue, green, purple and orange. In proteomic data, clustering was observed mainly according to disease stage (control vs chronic PV vs progressed PV) and to a lesser degree due to treatment (untreated vs HU-treated). In RNA-seq data, buffy coat control samples (CON1, CON2, CON3) clustered away from other samples.

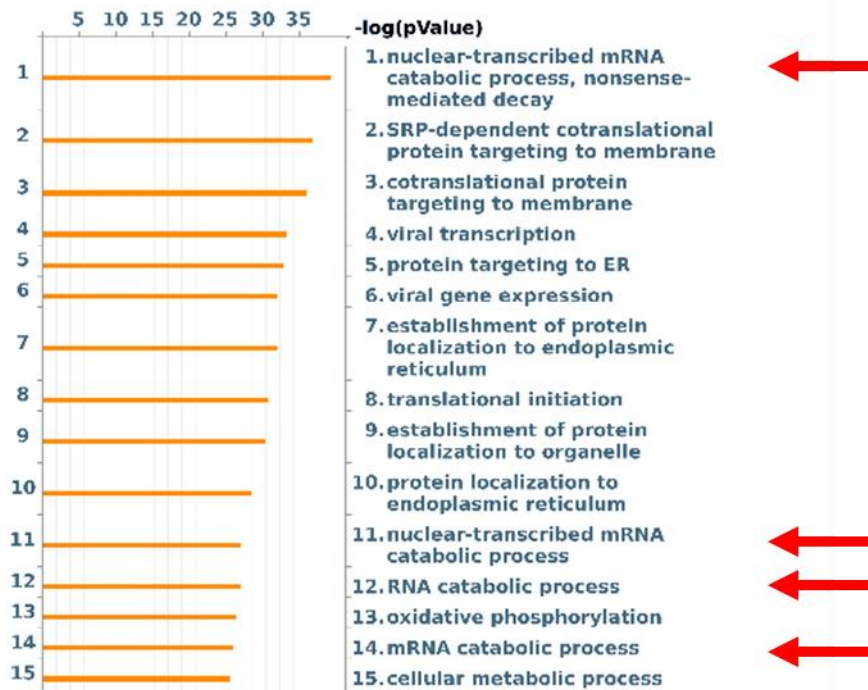

**Figure S6: Metacore pathway analysis of buffy coat over non-buffy coat samples.** Expression data of buffy coat samples compared to non-buffy coat samples was uploaded to Metacore (Clarivate; <https://portal.genego.com>; 05/2019), a web-based bioinformatics suite for pathway analysis. Pathway analysis was performed within Metacore (One-click analysis using GO Processes), applying the cutoffs of log<sub>2</sub> FC of 1.0 and p-value of 0.05. Buffy coat samples showed signs of RNA decay (upregulation of RNA catalytic processes). They were thus not included for further RNA analysis.



(A)

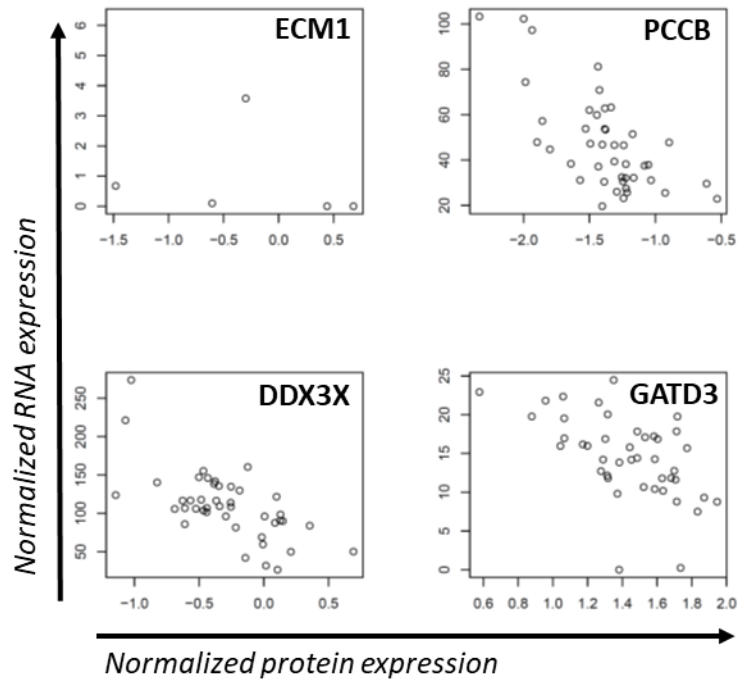

(B)

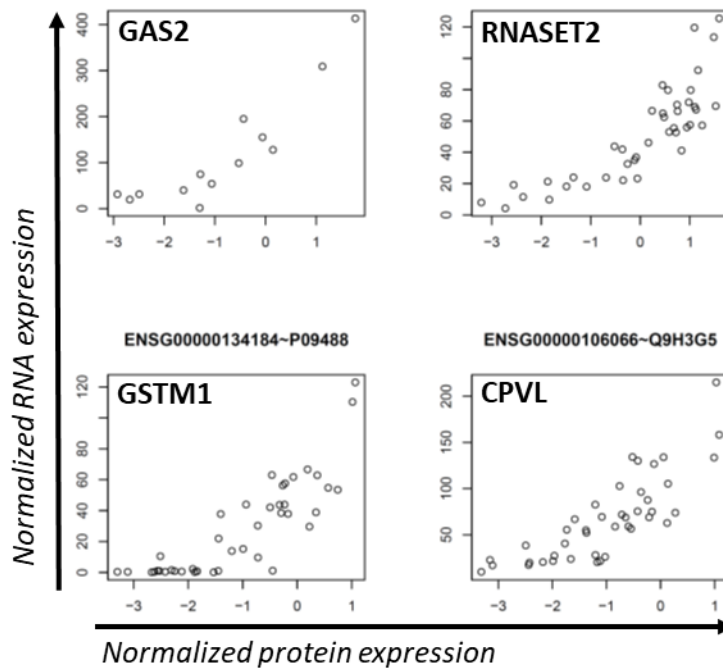

**Figure S7: Correlation between protein and RNA expression. (A)** Examples of negative correlation. **(B)** Examples of positive correlation.

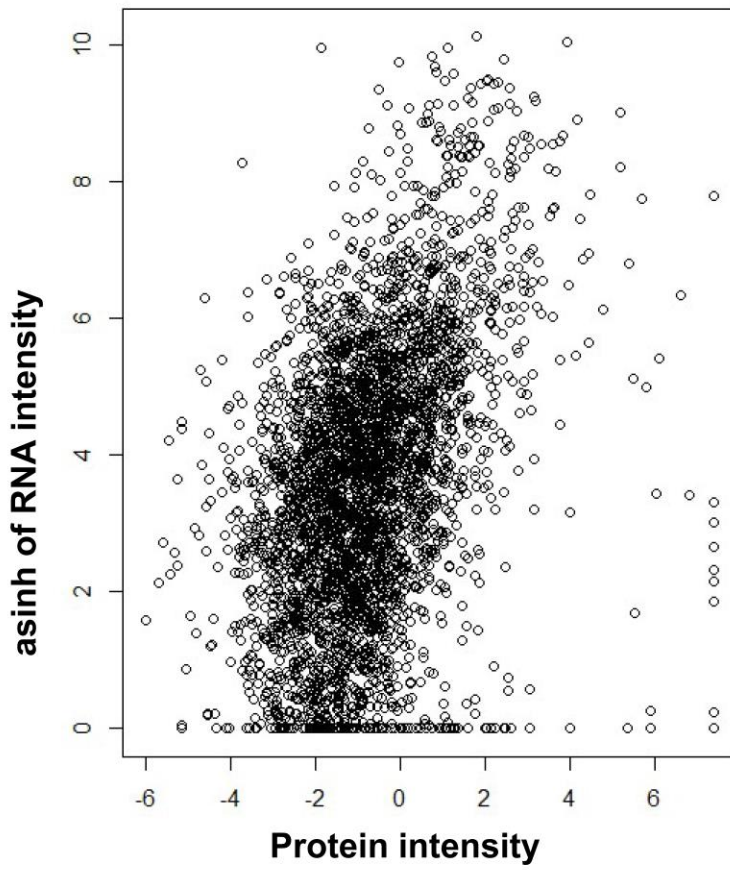

**Figure S8. Correlation between protein and RNA expression intensities.** Applying `cor(protMat[,1],asinh(geneMat[,1]), use="pairwise")` and `plot(protMat[,1],asinh(geneMat[,1]))` in R, a linear correlation of 0.38 was observed between RNA and protein intensity.



**(A) CLU: Peptide profile as basis of CLU protein quantification**

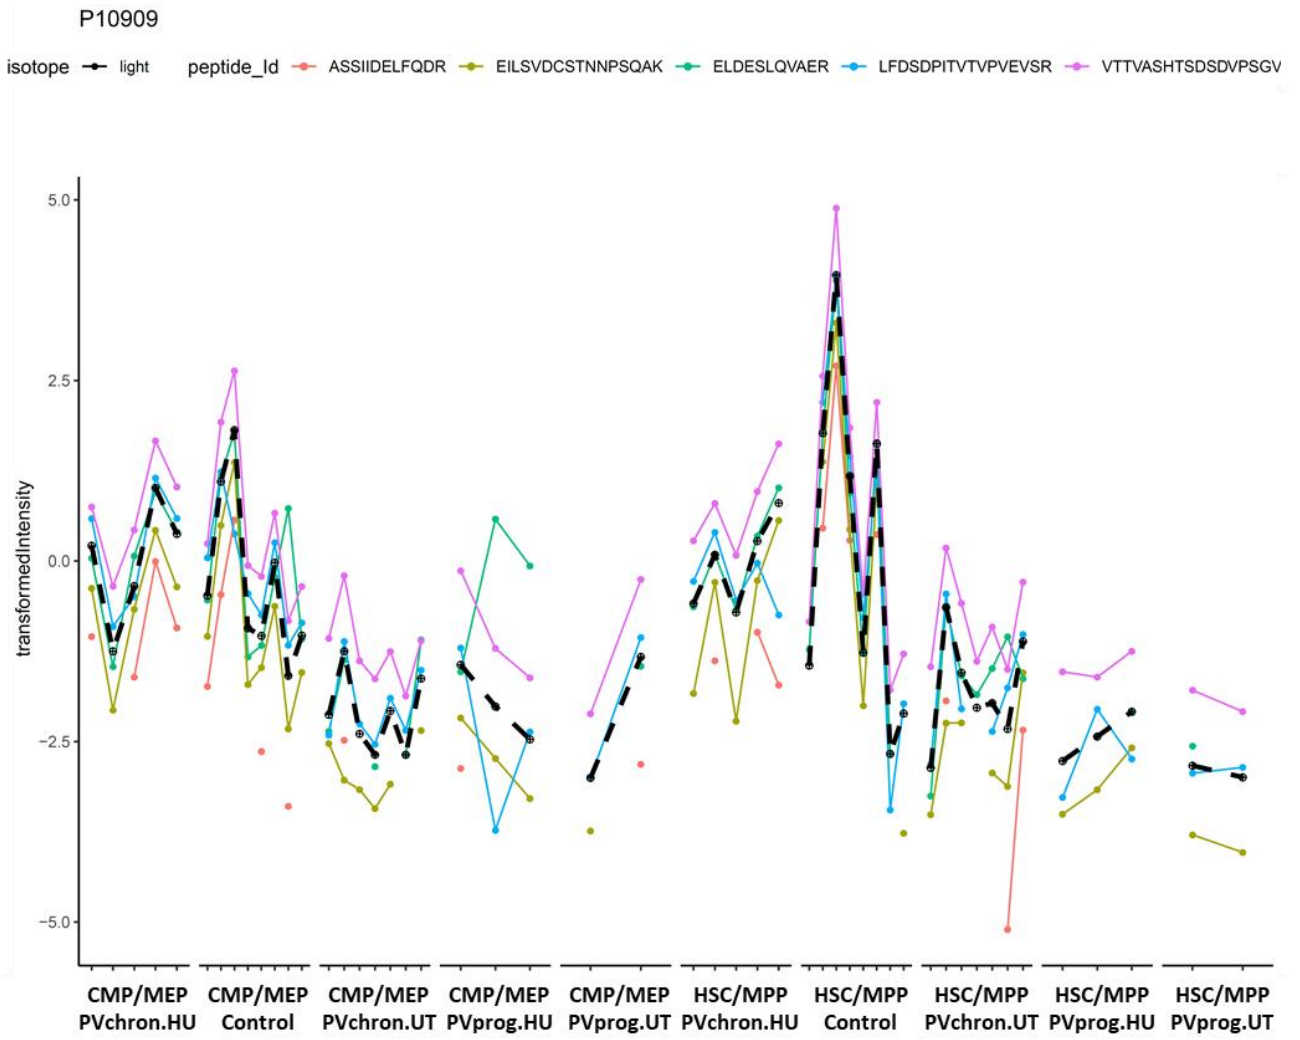

**(B) LGALS9: Peptide profile as basis of LGALS9 protein quantification**

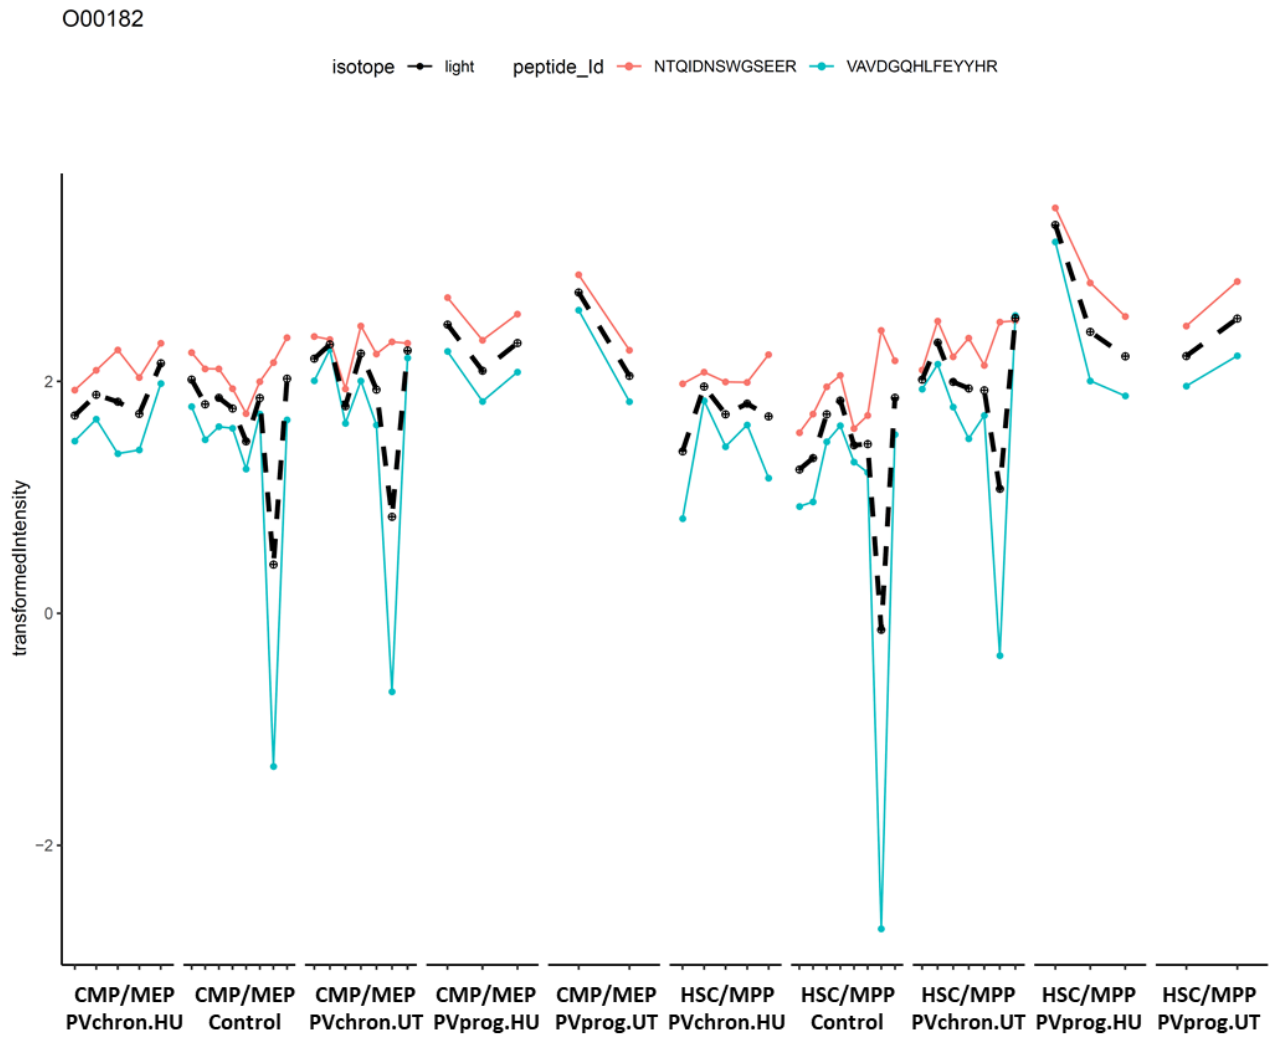

**(C) SOCS2: Peptide profile as basis of SOCS2 protein quantification**

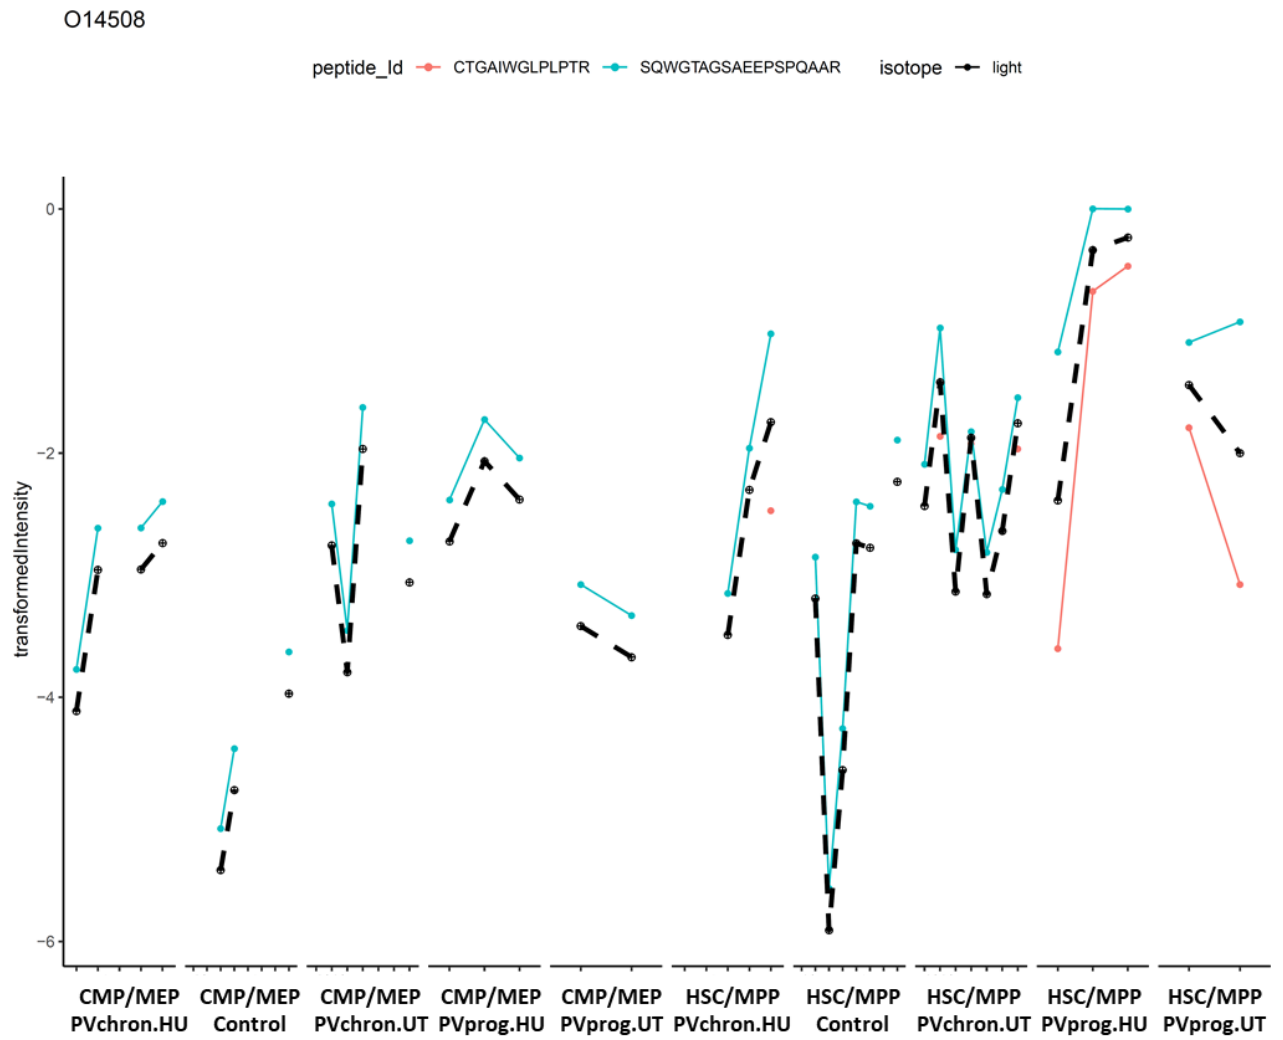

**Figure S9: Transformed intensities of the identified peptides contributing to the quantification of CLU (A), LGALS9 (B) and SOCS2 (C).** Individual peptides are shown in colored solid lines. Tukey's median polish is shown in dashed lines.

Abbreviations: UT – untreated; HU – under treatment with hydroxyurea; chron – chronic; prog – progressed.

## References

1. Rappsilber J, Ishihama Y, Mann M. Stop and go extraction tips for matrix-assisted laser desorption/ionization, nanoelectrospray, and LC/MS sample pretreatment in proteomics. *Anal Chem.* 2003;75(3):663-670.
2. Escher C, Reiter L, MacLean B, et al. Using iRT, a normalized retention time for more targeted measurement of peptides. *Proteomics.* 2012;12(8):1111-1121.
3. Perkins DN, Pappin DJ, Creasy DM, Cottrell JS. Probability-based protein identification by searching sequence databases using mass spectrometry data. *Electrophoresis.* 1999;20(18):3551-3567.
4. Eng JK, Jahan TA, Hoopmann MR. Comet: an open-source MS/MS sequence database search tool. *Proteomics.* 2013;13(1):22-24.
5. Schubert OT, Gillet LC, Collins BC, et al. Building high-quality assay libraries for targeted analysis of SWATH MS data. *Nat Protoc.* 2015;10(3):426-441.
6. Keller A, Nesvizhskii AI, Kolker E, Aebersold R. Empirical statistical model to estimate the accuracy of peptide identifications made by MS/MS and database search. *Anal Chem.* 2002;74(20):5383-5392.
7. Deutsch EW, Mendoza L, Shteynberg D, et al. A guided tour of the Trans-Proteomic Pipeline. *Proteomics.* 2010;10(6):1150-1159.
8. Shteynberg D, Deutsch EW, Lam H, et al. iProphet: multi-level integrative analysis of shotgun proteomic data improves peptide and protein identification rates and error estimates. *Mol Cell Proteomics.* 2011;10(12):M111 007690.
9. Reiter L, Claassen M, Schrimpf SP, et al. Protein identification false discovery rates for very large proteomics data sets generated by tandem mass spectrometry. *Mol Cell Proteomics.* 2009;8(11):2405-2417.
10. Lam H, Deutsch EW, Eddes JS, et al. Development and validation of a spectral library searching method for peptide identification from MS/MS. *Proteomics.* 2007;7(5):655-667.
11. Lam H, Deutsch EW, Eddes JS, Eng JK, Stein SE, Aebersold R. Building consensus spectral libraries for peptide identification in proteomics. *Nat Methods.* 2008;5(10):873-875.
12. Bruderer R, Bernhardt OM, Gandhi T, et al. Extending the limits of quantitative proteome profiling with data-independent acquisition and application to acetaminophen-treated three-dimensional liver microtissues. *Mol Cell Proteomics.* 2015;14(5):1400-1410.
13. Shibata T, Sakamoto J, Osaka Y, et al. Myeloperoxidase in blood neutrophils during normal and abnormal menstrual cycles in women of reproductive age. *Int J Lab Hematol.* 2017;39(2):169-174.
14. Marsee DK, Pinkus GS, Yu H. CD71 (transferrin receptor): an effective marker for erythroid precursors in bone marrow biopsy specimens. *Am J Clin Pathol.* 2010;134(3):429-435.
15. Rogers MF, Shihab HA, Mort M, Cooper DN, Gaunt TR, Campbell C. FATHMM-XF: accurate prediction of pathogenic point mutations via extended features. *Bioinformatics.* 2018;34(3):511-513.
